# Supplementary material
Source: PubMed Central journal article supplement (PMC3781975)
Supplement: 7ff987a82f4e5b0b449a6ca104df1ac3_genetics.113.154898-9.pdf [file 7ff987a82f4e5b0b449a6ca104df1ac3_genetics.113.154898-9.pdf]

**Table S4** Hps5I76N protein modeling parameters from SwissModel of N-terminus (residues #1-370).

| Residues  | Sequence identity | E-score | Q-MEAN4 raw score | Q-MEAN4 Z-score | ANOLEA score at #76 | GROMOS score at #76 |
|-----------|-------------------|---------|-------------------|-----------------|---------------------|---------------------|
| 30 to 104 | 19.5%             | 3.2E-24 | 0.584             | -1.27           | ~ -2.5              | ~ -160              |
