# Supplementary material
Source: PubMed Central journal article supplement (PMC3781975)
Supplement: 9e1061d8fc47791f3240b175af5470d8_genetics.113.154898-8.pdf [file 9e1061d8fc47791f3240b175af5470d8_genetics.113.154898-8.pdf]

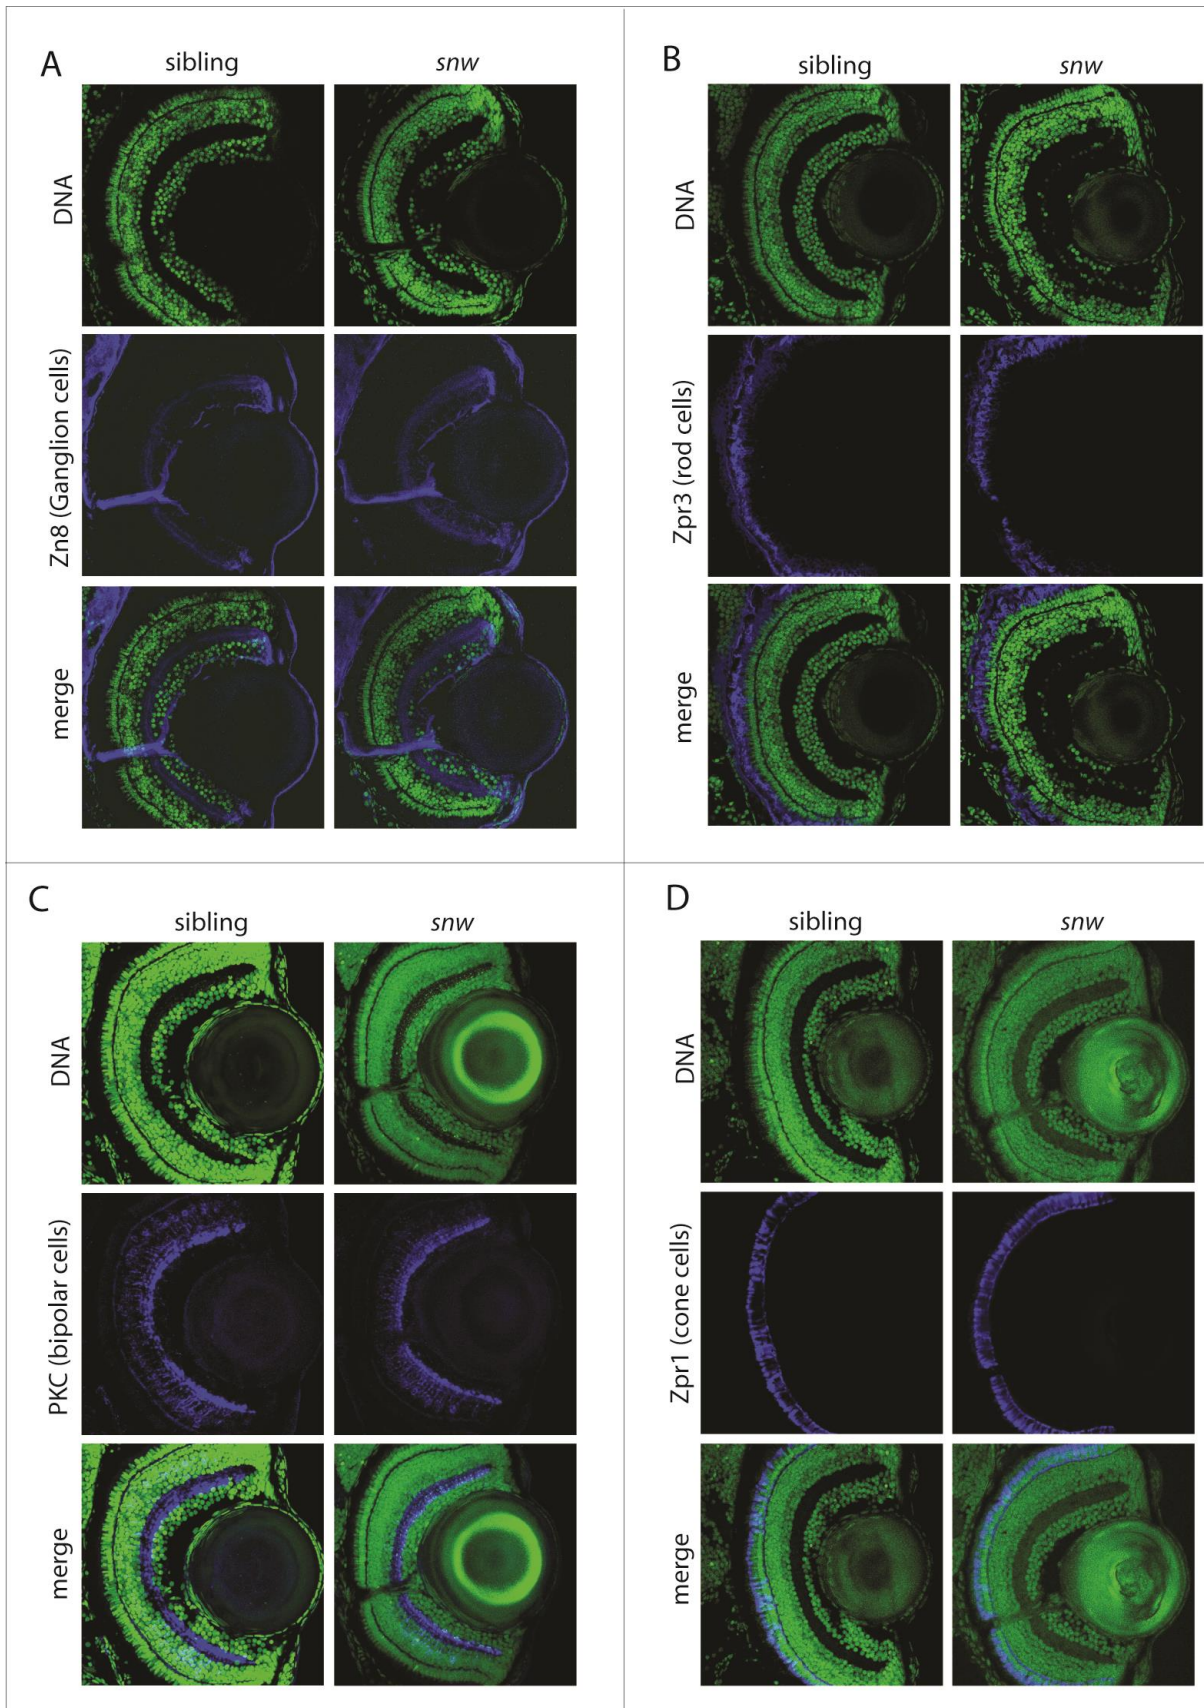

**Figure S1 Retinal cell differentiation appears largely normal in *snw* embryos.** (A-D) *snw* embryos at 5 dpf show typical expression of various retinal cell markers (blue) throughout the retina; images are counterstained with the nuclear stain, Sytox (green). (A) Ganglion cells were stained with the Zn8 antibody, (B) rod cells were stained with anti-Zpr3, (C) bipolar cells were stained with anti-PKC, and (D) cone cells were stained with anti-Zpr1.
