# Supplementary material
Source: PubMed Central journal article supplement (PMC3781975)
Supplement: 19d7f2a4375a50b225f45b32d5a1250b_genetics.113.154898-2.pdf [file 19d7f2a4375a50b225f45b32d5a1250b_genetics.113.154898-2.pdf]

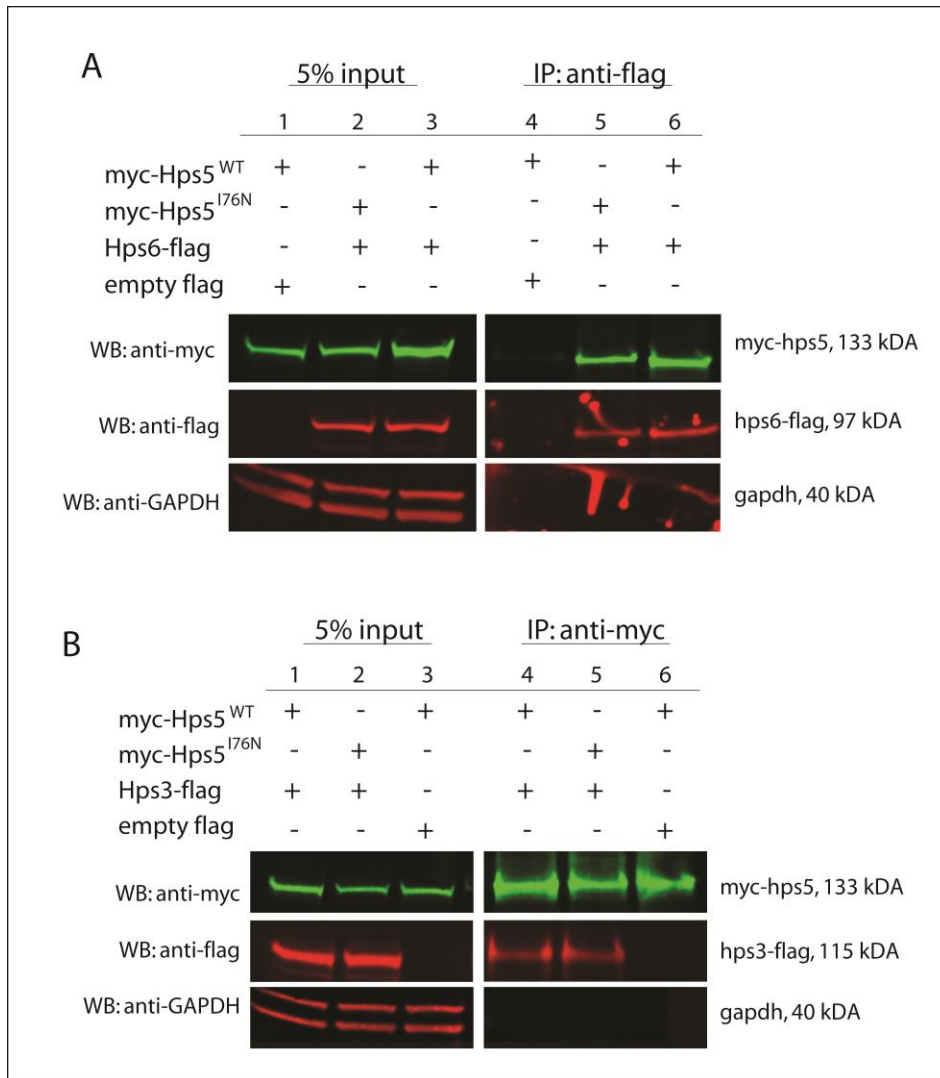

**Figure S4 Both Hps5<sup>WT</sup> and Hps5<sup>I76N</sup> bind to Hps6 and Hps3 *in vitro*.** (A) COS7 cells were transiently co-transfected with Hps5<sup>WT</sup>/empty vector, Hps5<sup>I76N</sup>/Hps6, or Hps5<sup>WT</sup>/Hps6 (lanes 1, 2, 3). Whole cell lysates were subjected to co-immunoprecipitation with flag antisera (IP:anti-flag, lanes 4, 5, 6). Western blots were detected with the antibodies indicated to the left (WB). Hps6 co-precipitates both Hps5<sup>WT</sup> and Hps5<sup>I76N</sup> individually (lanes 5, 6). (B) COS7 cells were transiently co-transfected with Hps5<sup>WT</sup>/Hps3, Hps5<sup>I76N</sup>/Hps3, or Hps5<sup>WT</sup>/empty vector (lanes 1, 2, 3). Whole cell lysates were subjected to co-immunoprecipitation with anti-myc antisera (IP:anti-myc, lanes 4, 5, 6). Western blots were detected with the antibodies indicated to the left (WB). Both Hps5<sup>WT</sup> and Hps5<sup>I76N</sup> co-precipitate Hps3 (lanes 4, 5).
