# Supplementary material
Source: PubMed Central journal article supplement (PMC3781975)
Supplement: 29d7e213305b346a2c81ac64725455a8_genetics.113.154898-7.pdf [file 29d7e213305b346a2c81ac64725455a8_genetics.113.154898-7.pdf]

**Table S1 Hps5<sup>WT</sup> protein modeling parameters from SwissModel of entire protein (residues #1-1133)**

| Residues | Sequence identity | E-score | Q-MEAN4 raw score | Q-MEAN4 Z-score | ANOLEA score at #76 | GROMOS score at #76 |
|----------|-------------------|---------|-------------------|-----------------|---------------------|---------------------|
| 31-152   | 22.0%             | 2.0E-7  | 0.480             | -3.34           | ~ +1                | ~ +20               |
| 73-189   | 17.4%             | 2.7E-6  | 0.407             | -3.89           | ~ +4                | ~ +10               |
| 31-358   | 12.6%             | 1.4E-6  | 0.208             | -8.99           | ~ +130              | ~ +10               |
