# Supplementary material
Source: PubMed Central journal article supplement (PMC3781975)
Supplement: 480ddb7ef7769900251caff7e97a5e57_genetics.113.154898-3.pdf [file 480ddb7ef7769900251caff7e97a5e57_genetics.113.154898-3.pdf]

**Table S3 Hps5I76N protein modeling parameters from SwissModel of entire protein (residues #1-1133)**

| Residues | Sequence identity | E-score | Q-MEAN4 raw score | Q-MEAN4 Z-score | ANOLEA score at #76 | GROMOS score at #76 |
|----------|-------------------|---------|-------------------|-----------------|---------------------|---------------------|
| 31-152   | 22.0%             | 1.9E-7  | 0.478             | -3.36           | ~ -3                | ~ -180              |
| 73-189   | 17.4%             | 2.6E-6  | 0.418             | -3.78           | ~ +2                | ~ -150              |
| 30-358   | 14.5%             | 3.2E-6  | 0.284             | -7.82           | ~ +4                | ~ -40               |
