# Supplementary material
Source: PubMed Central journal article supplement (PMC3781975)
Supplement: bee25e9cae4e8e42cab2fb2a4fc094cd_genetics.113.154898-5.pdf [file bee25e9cae4e8e42cab2fb2a4fc094cd_genetics.113.154898-5.pdf]

**A**

```

MIPVVPVESC THVLAEFDCL DPLLSALRLD SGRIKCTCLS VSRKWLALGT SAGGLHLIQR DGWKQKLILT HKEGSITQVS 80
CCPHDEDFIA VATSQGLVVV WELHLERRGR PERASVSWEH RGVTVTSLCW DTVALRVFAG DVGGKVSCVR AGSSKLGKGS 160
AFVIFPVQTV TTVDSRVVQL GYTDGHLVIS SLSRCYLCDT EREKFWRVGN KERDGEFGAC FLTQGLAQQR GQLVGCAPL 240
LFCARPGSRI WEASFSGEVL STHQFKQLLA VPPLPLVSCK NEPHFNPTQT NPQSLAFPRL LQFGDQNLTT WTDSAIYIFT 320
PHSGQVLLWT EVKDVLEISV FRNDLFCLHG DGRLSHMSLV SPDRCOVERLM KRENWTIAAT VCCMFQHAIT TSKARKSLSI 400
DRLEHLKAQL NSTSHQQLIG QLEEVISKLE PLDSACSSRR SSISSHESFN VLDCGIYRVI SRRGSQSDDD ASSLANQSM 480
EDERLKEFSF TEEEQVDNDS ASVRGEGDRS DLGLQFLPLP FRSKPPRVAL QAVRDSVSSF MKKTTEKINT LQMNADLWPR 560
PDLREGVQGE VASTASPISE ESEQELNTEH SGSESELLEL RAATKKAISQ IQDPMVLLDP LCLSDVLQEW APVLERALGP 640
EDQILPVETT NPEEKTLEEE ELVSSMSCCV VVQPEISTSP AADPDESATH TEEEDFREST PCSIAPVRAQ FPPLANHVEL 720
IQLFSPKPLP PDLQADLSLL ACLYLEMGCP GRGGMESVCV FLRRFFFLD QERVRRMCM RYRENREVLK AYYIAGMLEFT 800
QASKVVEVIQ KGDLLKSLRS LRELQPWNAP LLLSHLYRLY EKHGEVAVRA YPQFYPTILP SDIMAMALPS HFLPYLDNLV 880
QSRAEQQRLS FLGSLQPET LRQDWLELAL SHDAPQREDT LTHDQQRWH SHFFSWGYGR LLSLLIRLPA DLASKQKMLD 960
MCKAHGYWMG YLYLCRELQR RAEAFSAICR LDDMTLLEGD DGIVPQSLDE WVLLQLSQQ ISASDESSLT STKNSNGSCL 1040
VDANSNGDCS SGLSNGSTDW SIQVSPENII LRLVRVFGPD RALTALQEHG IPVVDHSSRST LVCDLLRMAE KRQRALIQSM 1120
LERCDRFLWS QHA* 1133

```

**B**

| Amino acid change  | Residue change   |
|--------------------|------------------|
| 76, <b>I</b> ->N   | 227, ATC -> AAC  |
| 107, <b>R</b> ->H  | 320, CGC -> CAC  |
| 133, <b>V</b> ->A  | 398, GTG -> GCG  |
| 170, <b>V</b> ->I  | 508, GTC -> ATC  |
| 182, <b>Y</b> ->N  | 544, TAC -> AAC  |
| 555, <b>A</b> ->S  | 1663, GCT -> TCT |
| 1025, <b>D</b> ->G | 3074, GAT -> GGT |
| 1034, <b>N</b> ->S | 3101, AAC -> AGC |
| 1035, <b>S</b> ->T | 3104, AGC -> ACC |
| 1062, <b>I</b> ->L | 3184, ATT -> CTT |
| 1063, <b>Q</b> ->R | 3188, CAG -> CGG |

**Figure S2 *Danio rerio hps5* sequence.** (A) *hps5* was cloned from both wild-type and *snw* embryos and aligned for comparison. Eleven single nucleotide polymorphisms (SNPs) were detected in the *snw* sequence when compared to the predicted Hps5 Zv9 sequence, highlighted by pink squares. Ten of these SNPs were eliminated as being the causative *snw* mutation as they were detected in wild-type AB strain adult zebrafish. (B) The amino acid sequence changes and corresponding nucleotide sequence changes are given, along with position numbers for reference.
