# Supplementary material
Source: PubMed Central journal article supplement (PMC3781975)
Supplement: d2cf6d3c48cb2a1802c5f661c3b177ee_genetics.113.154898-6.pdf [file d2cf6d3c48cb2a1802c5f661c3b177ee_genetics.113.154898-6.pdf]

**Table S2 Hps5WT protein modeling parameters from SwissModel of N-terminus (residues #1-370).**

| Residues | Sequence identity | E-score | Q-MEAN4 raw score | Q-MEAN4 Z-score | ANOLEA score at #76 | GROMOS score at #76 |
|----------|-------------------|---------|-------------------|-----------------|---------------------|---------------------|
| 30-103   | 21.6%             | 4.6E-19 | 0.667             | -0.736          | -5                  | +10                 |
