# Supplementary material
Source: PubMed Central journal article supplement (PMC3781975)
Supplement: f5435864e73cc0f613ca48404a3618c3_genetics.113.154898-4.pdf [file f5435864e73cc0f613ca48404a3618c3_genetics.113.154898-4.pdf]

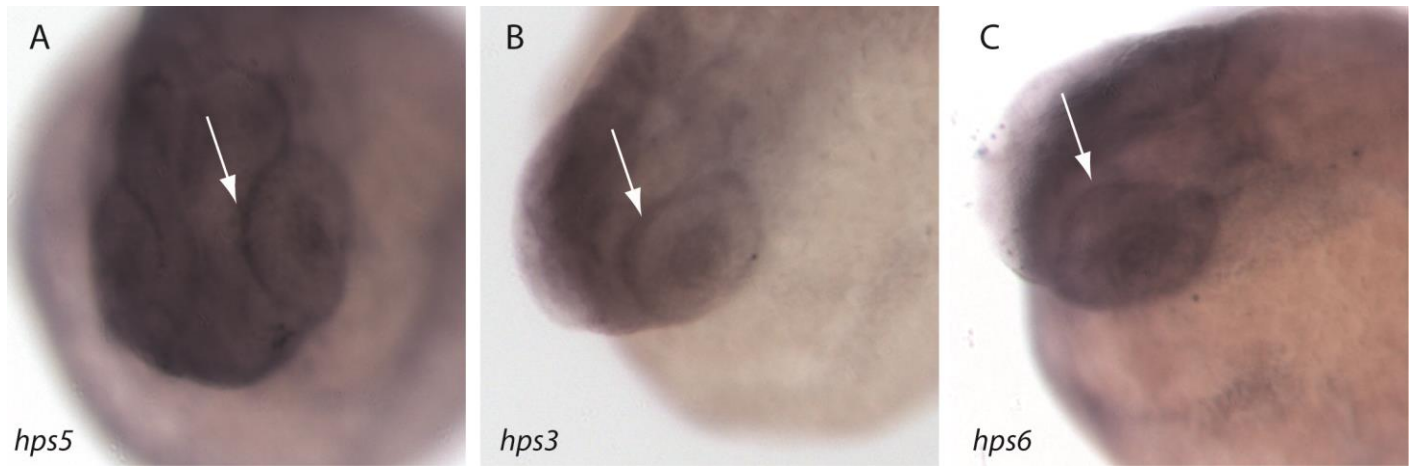

**Figure S3** **Bloc2** complex members are expressed in the developing zebrafish eye. *in situ* hybridization in 26hpf wild-type zebrafish embryos demonstrates that (A) *hps5*, (B) *hps3*, and (C) *hps6* are all expressed in the developing zebrafish embryo. The retinal pigmented epithelial (RPE) cell layer is identified by white arrows. Sense controls showed non-specific, background stain.
