# Supplementary material
Source: PubMed Central journal article supplement (PMC3781975)
Supplement: fb3a50c4b893a8aeb90b9310ccb35b09_genetics.113.154898-1.pdf [file fb3a50c4b893a8aeb90b9310ccb35b09_genetics.113.154898-1.pdf]

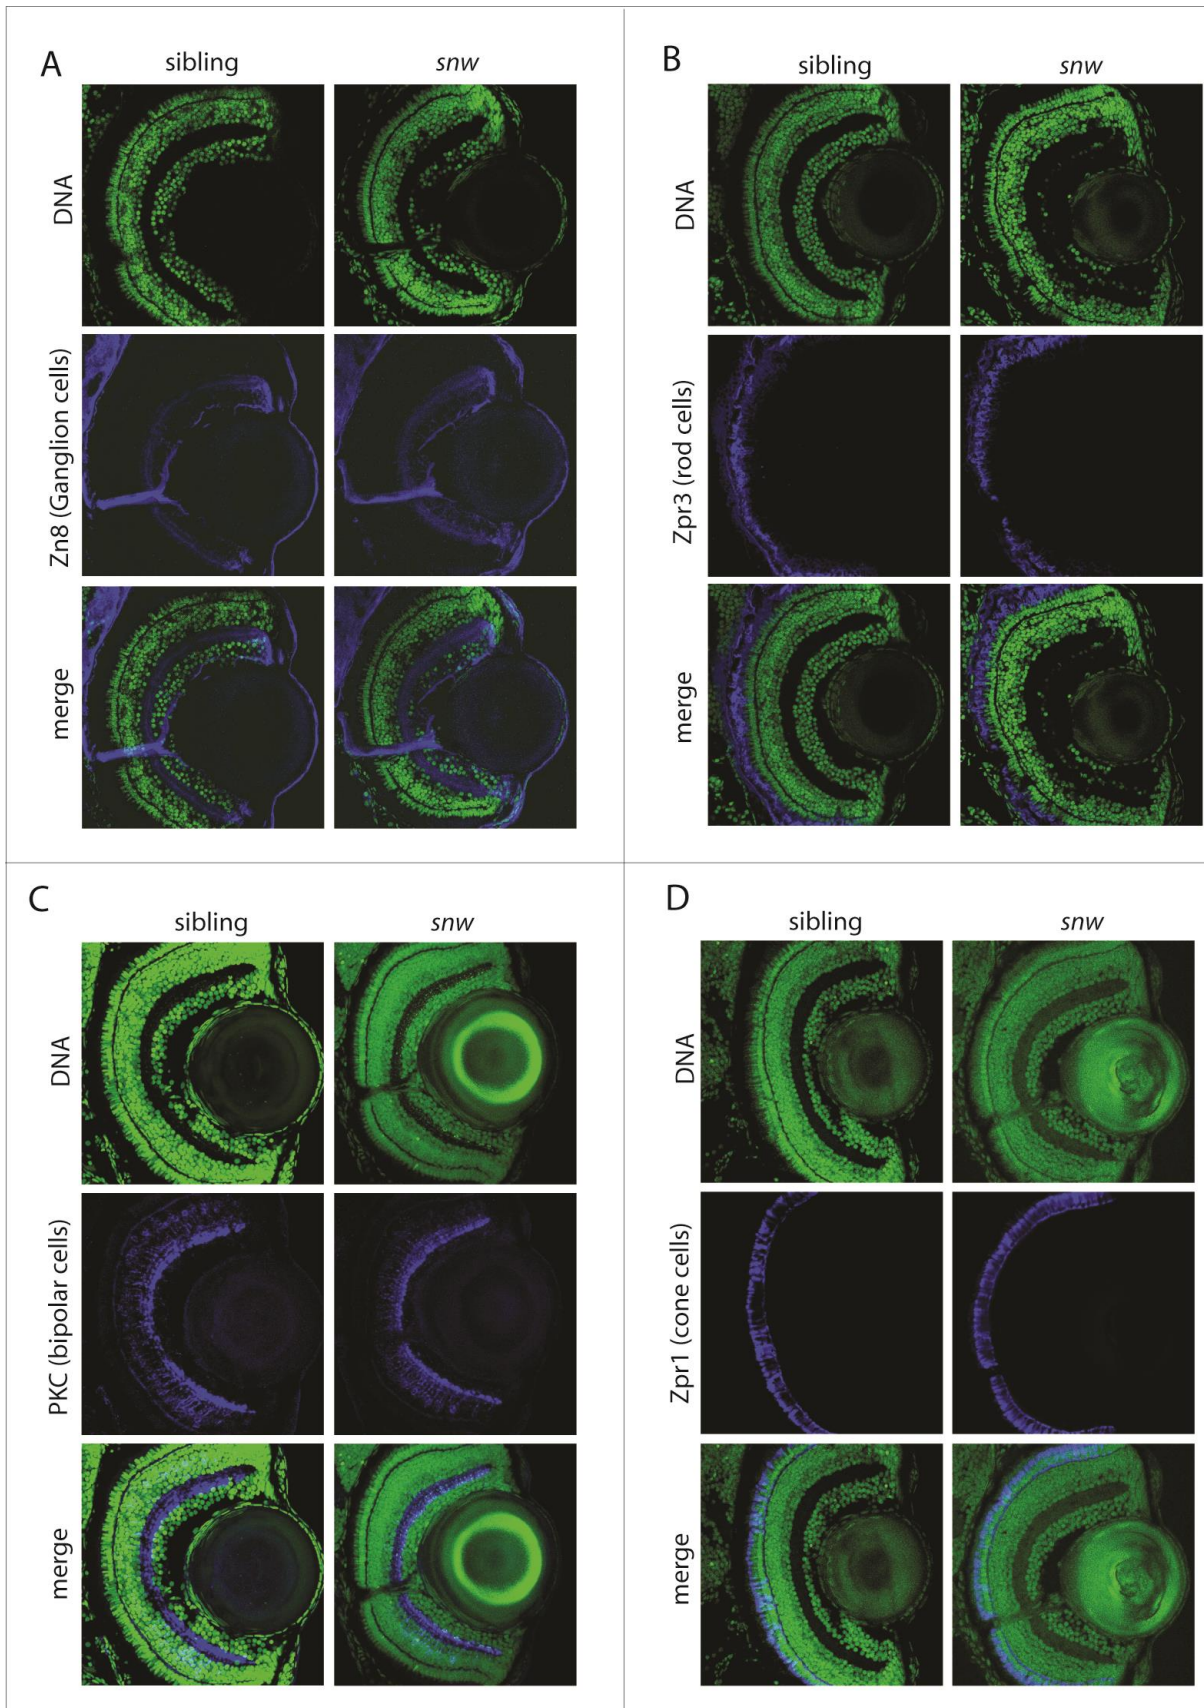

**Figure S1 Retinal cell differentiation appears largely normal in *snw* embryos.** (A-D) *snw* embryos at 5 dpf show typical expression of various retinal cell markers (blue) throughout the retina; images are counterstained with the nuclear stain, Sytox (green). (A) Ganglion cells were stained with the Zn8 antibody, (B) rod cells were stained with anti-Zpr3, (C) bipolar cells were stained with anti-PKC, and (D) cone cells were stained with anti-Zpr1.

**A**

```

MIPVVPVESC THVLAEFDCL DPLLSALRLD SGRIKCTCLS VSRKWLALGT SAGGLHLIQR DGWKQKLILT HKEGSITQVS 80
CCPHDEDFIA VATSQGLVVV WELHLERGR PERASVSWEH RGVTVTSLCW DTVALRVFAG DVGGKVSCVR AGSSKLGKGS 160
AFVIFPVQTV TTVDSRVVQL GYTDGHLVIS SLSRCYLCDT EREKFWRVGN KERDGEFGAC FLTQGLAGQR GQLVGCAPL 240
LFCARPGSRI WEASFSGEVL STHQFKQLLA VPPLPLVSCK NEPHFNPTQT NPQSLAFPRL LQFGDQNLTT WTDSAIYIFT 320
PHSQVLLWT EVKDVLEISV FRNDLFCLHG DGRLSHMSLV SPDRCOVERLM KRENWTIAAT VCCMFQHAIT TSKARKSLSI 400
DRLEHLKAQL NSTSHQQLIG QLEEVISKLE PLDSACSSRR SSISSHESFN VLDCGIYRVI SRRGSQSDDD ASSLANQSM 480
EDERLKEFSF TEEEQVDNDS ASVRGEGDRS DLGLQFLPLP FRSKPPRVAL QAVRDSVSSF MKKTTEKINT LQMNADLWPR 560
PDLREGVQGE VASTASPISE ESEQELNTEH SGSESELLEL RAATKKAISQ IQDPMVLLDP LCLSDVLQEW APVLERALGP 640
EDQILPVETT NPEEKTLEEE ELVSSMSCCV VVQPEISTSP AADPDESATH TEEEDFREST PCSIAPVRAQ FPPLANHVEL 720
IQLFSPKPLP PDLQADLSLL ACLYLEMGCP GRGGMESVCV FLRRFFFLD QERVRRMCM LRYRENREVLK AYYIAGMLEFT 800
QASKVVEVIQ KGDLLKSLRS LRELQPNWAP LLLSHLYRLY EKHGEVAVRA YPQFYPTILP SDIMAMALPS HFLPYLDNLV 880
QSRAEQQRLS FLGSLQPET LRQDWLELAL SHDAPQREDT LTHDQPRWH SHFFSWGYGR LLSLLIRLPA DLASKQKMLD 960
MCKAHGYWMC YLYLCRELQR RAEAFSAICR LDDMTLLEGD DGIVPQSLDE WVLLQLSQQ ISASDESSLT STKNSNGSCL 1040
VDANSNGDCS SGLSNGSTDW SIOVSPENII LRLVRVFGPD RALTALQEHG IPVVDHSSRST LVCDDLRRMAE KRQRALIQSM 1120
LERCDRFLWS QHA* 1133

```

**B**

| Amino acid change | Residue change   |
|-------------------|------------------|
| 76, I->N          | 227, ATC -> AAC  |
| 107, R->H         | 320, CGC -> CAC  |
| 133, V->A         | 398, GTG -> GCG  |
| 170, V->I         | 508, GTC -> ATC  |
| 182, Y->N         | 544, TAC -> AAC  |
| 555, A->S         | 1663, GCT -> TCT |
| 1025, D->G        | 3074, GAT -> GGT |
| 1034, N->S        | 3101, AAC -> AGC |
| 1035, S->T        | 3104, AGC -> ACC |
| 1062, I->L        | 3184, ATT -> CTT |
| 1063, Q->R        | 3188, CAG -> CGG |

**Figure S2 *Danio rerio hps5* sequence.** (A) *hps5* was cloned from both wild-type and *snw* embryos and aligned for comparison. Eleven single nucleotide polymorphisms (SNPs) were detected in the *snw* sequence when compared to the predicted Hps5 Zv9 sequence, highlighted by pink squares. Ten of these SNPs were eliminated as being the causative *snw* mutation as they were detected in wild-type AB strain adult zebrafish. (B) The amino acid sequence changes and corresponding nucleotide sequence changes are given, along with position numbers for reference.

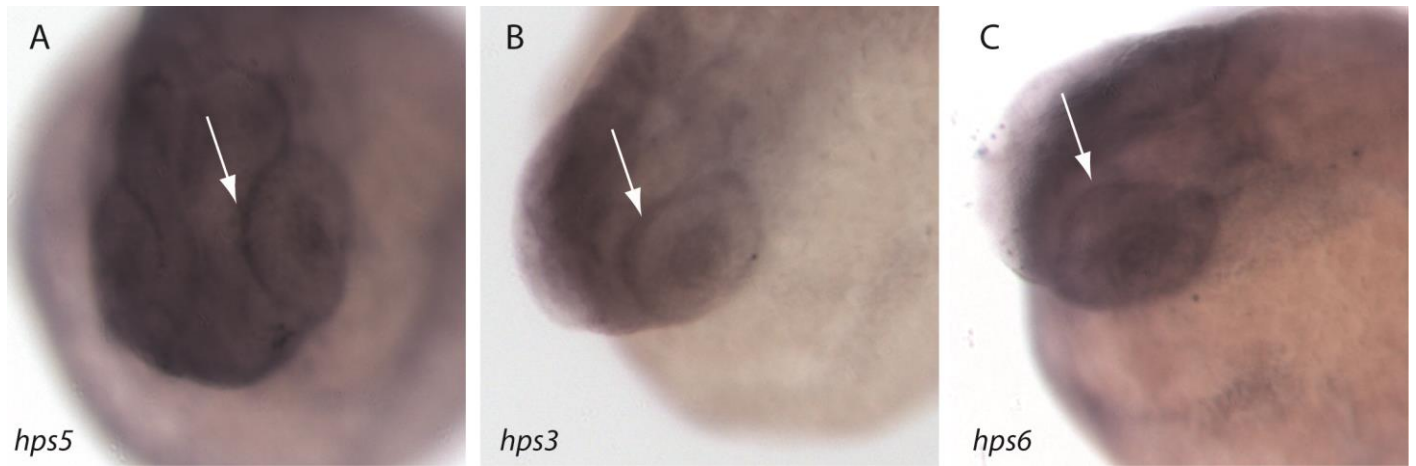

**Figure S3** **Bloc2** complex members are expressed in the developing zebrafish eye. *in situ* hybridization in 26hpf wild-type zebrafish embryos demonstrates that (A) *hps5*, (B) *hps3*, and (C) *hps6* are all expressed in the developing zebrafish embryo. The retinal pigmented epithelial (RPE) cell layer is identified by white arrows. Sense controls showed non-specific, background stain.

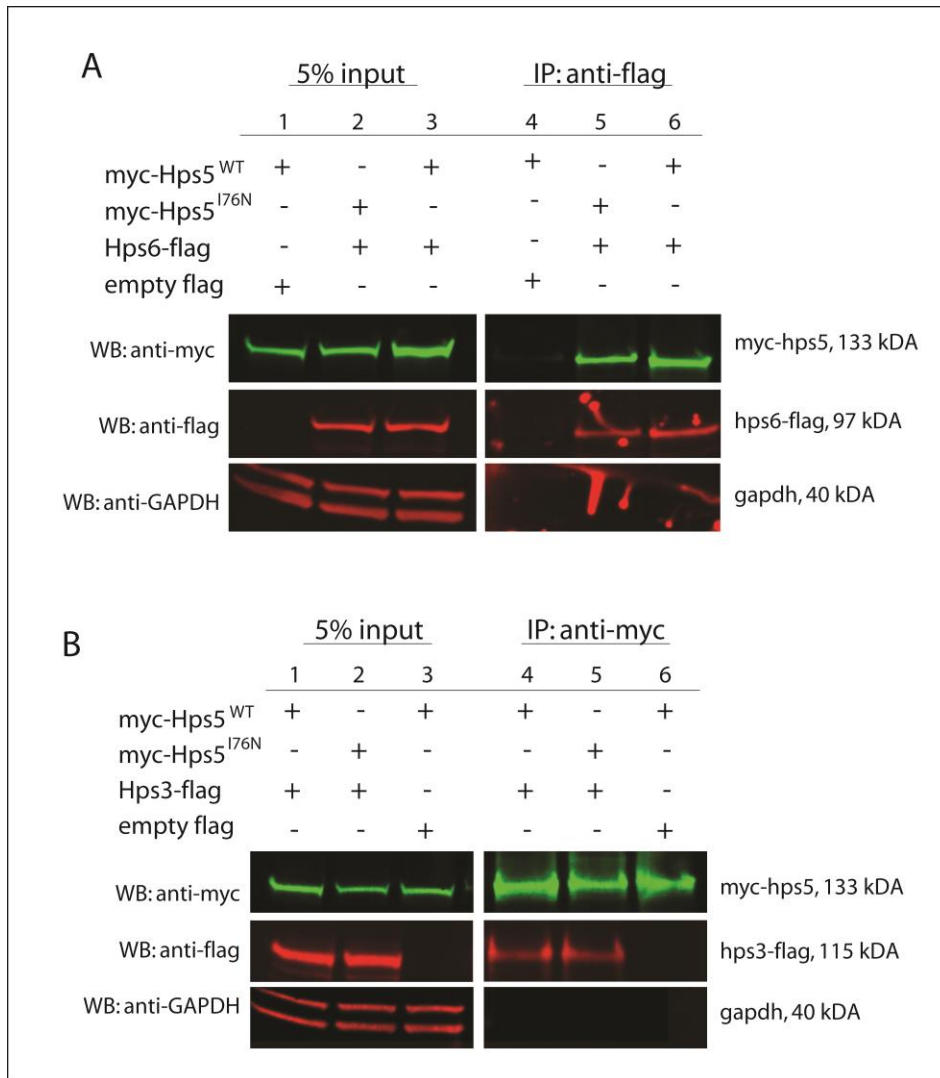

**Figure S4 Both Hps5<sup>WT</sup> and Hps5<sup>I76N</sup> bind to Hps6 and Hps3 *in vitro*.** (A) COS7 cells were transiently co-transfected with Hps5<sup>WT</sup>/empty vector, Hps5<sup>I76N</sup>/Hps6, or Hps5<sup>WT</sup>/Hps6 (lanes 1, 2, 3). Whole cell lysates were subjected to co-immunoprecipitation with flag antisera (IP:anti-flag, lanes 4, 5, 6). Western blots were detected with the antibodies indicated to the left (WB). Hps6 co-precipitates both Hps5<sup>WT</sup> and Hps5<sup>I76N</sup> individually (lanes 5, 6). (B) COS7 cells were transiently co-transfected with Hps5<sup>WT</sup>/Hps3, Hps5<sup>I76N</sup>/Hps3, or Hps5<sup>WT</sup>/empty vector (lanes 1, 2, 3). Whole cell lysates were subjected to co-immunoprecipitation with anti-myc antisera (IP:anti-myc, lanes 4, 5, 6). Western blots were detected with the antibodies indicated to the left (WB). Both Hps5<sup>WT</sup> and Hps5<sup>I76N</sup> co-precipitate Hps3 (lanes 4, 5).

**Table S1 Hps5<sup>WT</sup> protein modeling parameters from SwissModel of entire protein (residues #1-1133)**

| Residues | Sequence identity | E-score | Q-MEAN4 raw score | Q-MEAN4 Z-score | ANOLEA score at #76 | GROMOS score at #76 |
|----------|-------------------|---------|-------------------|-----------------|---------------------|---------------------|
| 31-152   | 22.0%             | 2.0E-7  | 0.480             | -3.34           | ~ +1                | ~ +20               |
| 73-189   | 17.4%             | 2.7E-6  | 0.407             | -3.89           | ~ +4                | ~ +10               |
| 31-358   | 12.6%             | 1.4E-6  | 0.208             | -8.99           | ~ +130              | ~ +10               |

**Table S2 Hps5WT protein modeling parameters from SwissModel of N-terminus (residues #1-370).**

| Residues | Sequence identity | E-score | Q-MEAN4 raw score | Q-MEAN4 Z-score | ANOLEA score at #76 | GROMOS score at #76 |
|----------|-------------------|---------|-------------------|-----------------|---------------------|---------------------|
| 30-103   | 21.6%             | 4.6E-19 | 0.667             | -0.736          | -5                  | +10                 |

**Table S3 Hps5I76N protein modeling parameters from SwissModel of entire protein (residues #1-1133)**

| Residues | Sequence identity | E-score | Q-MEAN4 raw score | Q-MEAN4 Z-score | ANOLEA score at #76 | GROMOS score at #76 |
|----------|-------------------|---------|-------------------|-----------------|---------------------|---------------------|
| 31-152   | 22.0%             | 1.9E-7  | 0.478             | -3.36           | ~ -3                | ~ -180              |
| 73-189   | 17.4%             | 2.6E-6  | 0.418             | -3.78           | ~ +2                | ~ -150              |
| 30-358   | 14.5%             | 3.2E-6  | 0.284             | -7.82           | ~ +4                | ~ -40               |

**Table S4** Hps5I76N protein modeling parameters from SwissModel of N-terminus (residues #1-370).

| Residues  | Sequence identity | E-score | Q-MEAN4 raw score | Q-MEAN4 Z-score | ANOLEA score at #76 | GROMOS score at #76 |
|-----------|-------------------|---------|-------------------|-----------------|---------------------|---------------------|
| 30 to 104 | 19.5%             | 3.2E-24 | 0.584             | -1.27           | ~ -2.5              | ~ -160              |
